# Supplementary material for: Oil-Based Double Emulsion Microcarriers for Enhanced Stability and Bioaccessibility of Betalains and Phenolic Compounds from Opuntia stricta var. dillenii Green Extracts
Source: MDPI journal article supplement (doi:10.3390/foods12112243), 2023-06-01
Supplement: s1 [file s1]

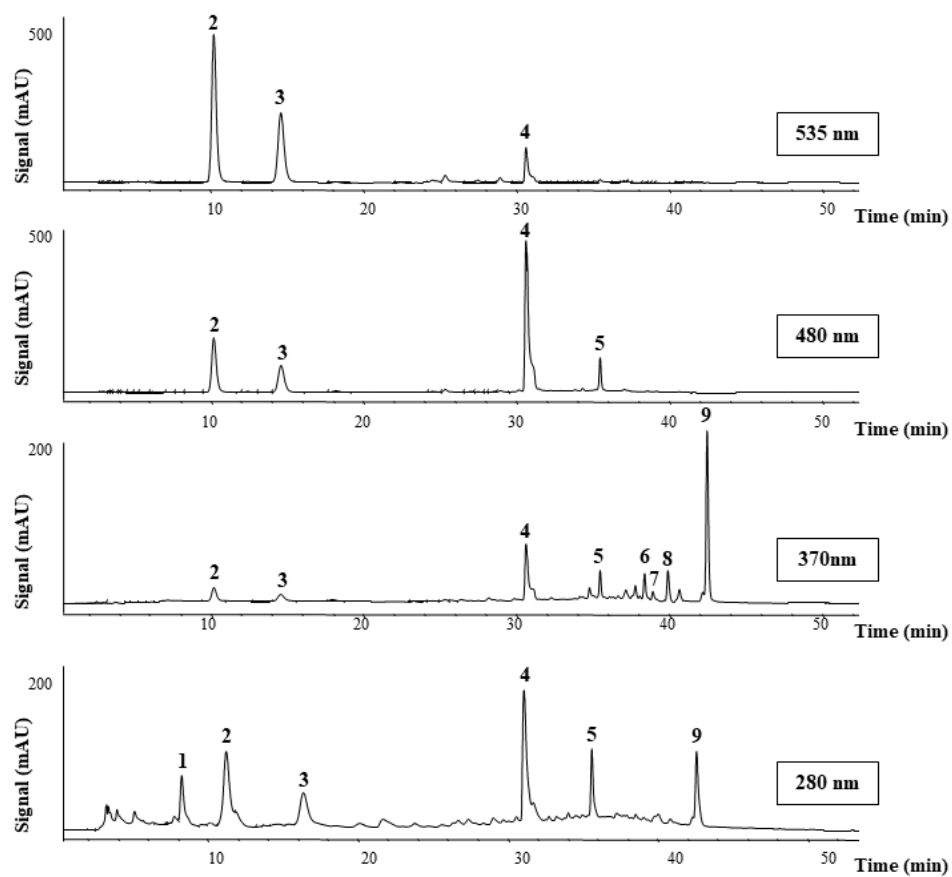

**Figure S1.** HPLC chromatograms of betalains and phenolic compounds from *Opuntia stricta* var. *dillenii* green extracts. The numbers associated to the peaks are according to Table S1.

**Table S1.** Characterization of the main betalains and phenolic compounds present in *Opuntia stricta* var. *dillenii* green extracts analyzed by HPLC-DAD and HPLC-MS<sup>1</sup>.

| Peak | t <sub>R</sub> (min) | Compound                                             | UV λ max (nm) | [M-H] <sup>+</sup> | [M-H] <sup>-</sup> | MS/MS (m/z)             |
|------|----------------------|------------------------------------------------------|---------------|--------------------|--------------------|-------------------------|
| 1    | 8.83                 | Piscidic acid                                        | 272           |                    | 255                | 193, 165, 135, 119, 107 |
| 2    | 10.76                | Betanin                                              | 535           | 551                |                    | 390, 389                |
| 3    | 15.23                | Isobetanin                                           | 535           | 551                |                    | 390, 389                |
| 4    | 31.34                | Neobetanin                                           | 467           |                    | 549                | 387                     |
| 5    | 35.14                | Quercetin-3-O-rhamnosyl-rutinoside (QG3)             | 358           | 757                |                    | 611, 303                |
| 6    | 38.65                | Quercetin hexosyl pentosyl rhamnoside (QG1)          | 255, 358      | 426                |                    | 303, 191, 120           |
| 7    | 39.56                | Quercetin glycoside (QG2)-Quercetin hexose pentoside | 255, 353      | 653                |                    | 303, 177                |
| 8    | 40.00                | Isorhamnetin glucoxyl-rhamnosyl-rhamnoside (IG1)     | 256, 356      | 771                |                    | 625, 317, 85            |
| 9    | 42.57                | Isorhamnetin glucoxyl-rhamnosyl-pentoside (IG2)      | 254, 356      | 757                |                    | 317, 167, 86            |

<sup>1</sup>Data were previously published by Gómez-López et al, 2021 [5].

**Table S2.** Composition of the digestive phases and the enzymes used for the *in vitro* gastrointestinal digestion assay by INFOGEST method.

| Simulated digestive phases at 1:1 (w/w)           |           |                |                   |                      |
|---------------------------------------------------|-----------|----------------|-------------------|----------------------|
| Reagents                                          | Stock     | Simulated oral | Simulated gastric | Simulated intestinal |
|                                                   |           | phase          | phase             | phase                |
| % (v/v)                                           |           |                |                   |                      |
| KCl                                               | 0.5 M     | 2              | 5.6               | 2.16                 |
| KH <sub>2</sub> PO <sub>4</sub>                   | 0.5 M     | 4              | 0.18              | 0.32                 |
| NaHCO <sub>3</sub>                                | 1 M       | 0.8            | 2.6               | 17.0                 |
| NaCl                                              | 2 M       | 0.2            | 2                 | 3.2                  |
| MgCl <sub>2</sub> (H <sub>2</sub> O) <sub>6</sub> | 0.15 M    | 0.2            | 0.4               | 0.44                 |
| HCl                                               | 1 M       | 0.8            | 0.6               | 0.2                  |
| NaOH                                              | 1 M       | 0.2            | -                 | 0.32                 |
| MilliQ water                                      | -         | 91.8           | 88.62             | 76.36                |
| pH                                                |           | 6.8            | 1.3               | 8.2                  |
| Addition of enzyme % (v/v)                        |           |                |                   |                      |
| Salivary amylase                                  | 75 U/ml   | 5              | -                 | -                    |
| Pepsine                                           | 2500 U/ml | -              | 4 - 8*            | -                    |
| Lipase                                            | 25 U/ml   | -              | 4                 | -                    |
| Pancreatine                                       | 100 U/ml  | -              | -                 | 12                   |
| Bile salt                                         | 10 Mm     | -              | -                 | 6                    |

\* Only added when the assay was performed with lipase.

**Table S3.** Recovery of main betalains and phenolic compounds from *Opuntia stricta* var. *dillenii* green extracts (control) encapsulated by Formulation A and Formulation B after *in vitro* gastro-intestinal digestion.

| Compound                                        | In vitro phase | OPD green Extract <sup>2</sup> | Recovery (%) <sup>1</sup>  |                            |                            |                           |
|-------------------------------------------------|----------------|--------------------------------|----------------------------|----------------------------|----------------------------|---------------------------|
|                                                 |                |                                | Formulation A <sup>3</sup> |                            | Formulation B <sup>3</sup> |                           |
|                                                 |                |                                | w/o lipase                 | w/ lipase                  | w/o lipase                 | w/ lipase                 |
| BETALAINS                                       |                |                                |                            |                            |                            |                           |
| Betanin                                         | Oral           | 91.7 ± 0.3                     | 114.5 ± 3.4 <sup>Aa</sup>  | 106.5 ± 14.9 <sup>Aa</sup> | 113.1 ± 1.3 <sup>Aa</sup>  | 90.1 ± 7.1 <sup>Ba</sup>  |
|                                                 | Gastric        | 87.8 ± 2.2                     | 108.4 ± 4.4 <sup>Aa</sup>  | 83.1 ± 5.9 <sup>Ba</sup>   | 71.1 ± 0.4 <sup>Ab</sup>   | 74.1 ± 13 <sup>Aa</sup>   |
|                                                 | Intestinal     | 35.3 ± 0.2                     | 93.4 ± 0.9 <sup>Aa</sup>   | 70.8 ± 1.8 <sup>Ba</sup>   | 67.1 ± 0.1 <sup>Ab</sup>   | 56.3 ± 0.2 <sup>Bb</sup>  |
| Isobetanin                                      | Oral           | 79.8 ± 0.2                     | 123.5 ± 5.5 <sup>Aa</sup>  | 101.6 ± 1.8 <sup>Ba</sup>  | 104.7 ± 4.7 <sup>Ab</sup>  | 88.2 ± 3.3 <sup>Bb</sup>  |
|                                                 | Gastric        | 68.8 ± 0.1                     | 99.9 ± 3.9 <sup>Aa</sup>   | 81.7 ± 8.5 <sup>Aa</sup>   | 69.3 ± 6.6 <sup>Ab</sup>   | 68.1 ± 13.5 <sup>Aa</sup> |
|                                                 | Intestinal     | 30.1 ± 0.1                     | 90.9 ± 0.9 <sup>Aa</sup>   | 68.1 ± 0.6 <sup>Ba</sup>   | 67.7 ± 1 <sup>Ab</sup>     | 55.8 ± 3.6 <sup>Bb</sup>  |
| Neobetanin                                      | Oral           | 52.6 ± 0.6                     | 84.6 ± 1.6 <sup>Ba</sup>   | 93.7 ± 4.9 <sup>Aa</sup>   | 60 ± 7.5 <sup>Ab</sup>     | 38.5 ± 6.9 <sup>Bb</sup>  |
|                                                 | Gastric        | 48.1 ± 4.3                     | 69.3 ± 5.2                 | n.d.                       | 53.6 ± 6.2 <sup>A</sup>    | 18.8 ± 1.2 <sup>B</sup>   |
|                                                 | Intestinal     | 47.2 ± 0.1                     | 52.9 ± 9.1 <sup>Aa</sup>   | 41.7 ± 1 <sup>Ba</sup>     | 44.5 ± 1.9 <sup>Ab</sup>   | 11.5 ± 0.7 <sup>Bb</sup>  |
| PHENOLIC ACIDS                                  |                |                                |                            |                            |                            |                           |
| Piscidic acid                                   | Oral           | 96.1 ± 4.4                     | 47.9 ± 2.1 <sup>Ab</sup>   | 47.5 ± 5.5 <sup>Ab</sup>   | 118.3 ± 0.8 <sup>Aa</sup>  | 77.5 ± 1.1 <sup>Ba</sup>  |
|                                                 | Gastric        | 96.1 ± 3.9                     | 79.2 ± 1.2 <sup>Ab</sup>   | 42.5 ± 7.2 <sup>Bb</sup>   | 113.2 ± 2.5 <sup>Aa</sup>  | 128.2 ± 1.4 <sup>Ba</sup> |
|                                                 | Intestinal     | 64.3 ± 3.3                     | 253.1 ± 5.8 <sup>Aa</sup>  | 251.9 ± 4.8 <sup>Aa</sup>  | 226.9 ± 0.9 <sup>Ab</sup>  | 247.3 ± 5.4 <sup>Ba</sup> |
| FLAVONOIDS                                      |                |                                |                            |                            |                            |                           |
| Isorhamnetin glucoxyl-rhamnosyl-pentoside (IG2) | Oral           | 73.9 ± 2.4                     | 107.7 ± 3.5 <sup>Aa</sup>  | 87.1 ± 0.1 <sup>Ba</sup>   | 81.9 ± 4.4 <sup>Ab</sup>   | 62.58 ± 4.9 <sup>Bb</sup> |
|                                                 | Gastric        | 68.7 ± 0.6                     | 92.1 ± 6.7 <sup>Aa</sup>   | 84.2 ± 2.5 <sup>Aa</sup>   | 65.5 ± 2.8 <sup>Ab</sup>   | 62.4 ± 12.6 <sup>Ab</sup> |
|                                                 | Intestinal     | 23.5 ± 0.3                     | 91.1 ± 2.8 <sup>Aa</sup>   | 75.7 ± 3.8 <sup>Ba</sup>   | 58.7 ± 0.5 <sup>Ab</sup>   | 46.2 ± 5.3 <sup>Bb</sup>  |

<sup>1</sup>Results were expressed as mean ± standard deviation. This came from obtaining at least two independent measurements (n= 2) of each sample. Superscript capital letters indicate statistically significant differences (p ≤ 0.05) between gastro-intestinal digestion phases without or with lipase within the same formulation. Superscript lower-case letters indicate statistically differences (p ≤ 0.05) between the different formulations under the same conditions of using or not using lipase.

<sup>2</sup> OPD green Extract refers to the green extracts obtained from *Opuntia stricta* var. *dillenii*'s whole fruits. <sup>3</sup> Formulation A, based on Tween 20 and Formulation B, based on caseinate.
